# Supplementary material
Source: PubMed Central journal article supplement (PMC4198730)
Supplement: NIHMS403372-supplement-supplement_1.pdf [file NIHMS403372-supplement-supplement_1.pdf]

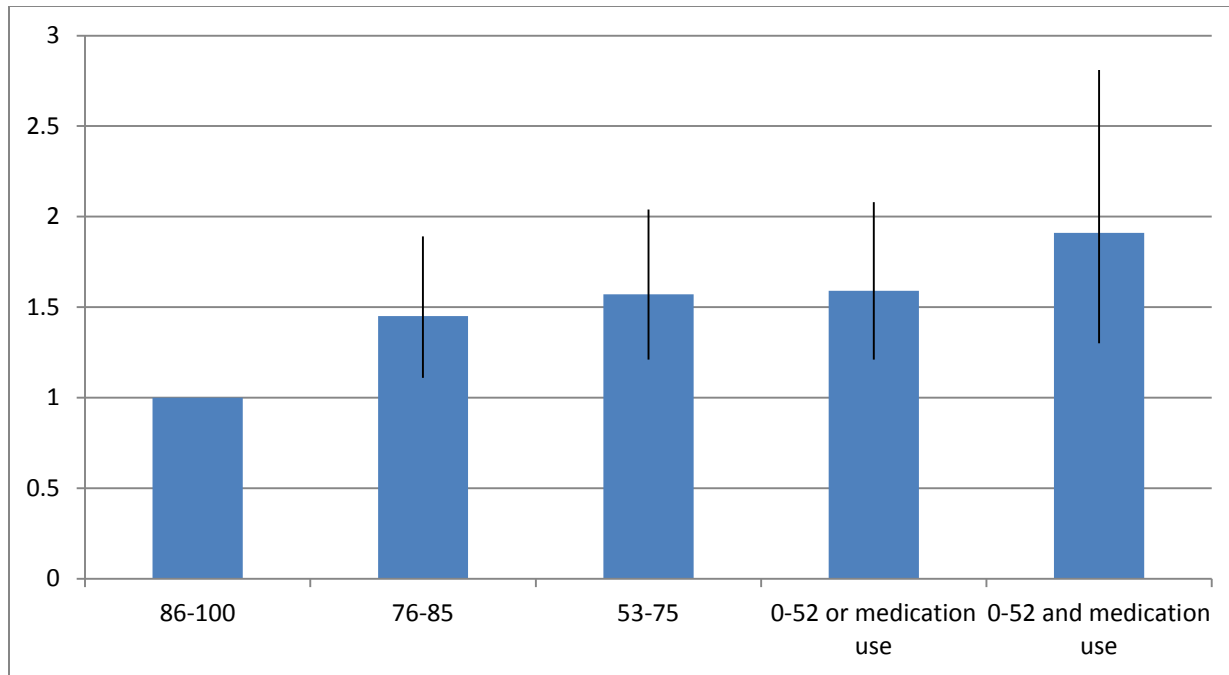

Supplemental Fig. 1 Multivariate relative risk of subsequent psoriasis by Mental Health Index score and anti-depression medication use among self-reported cases of psoriasis

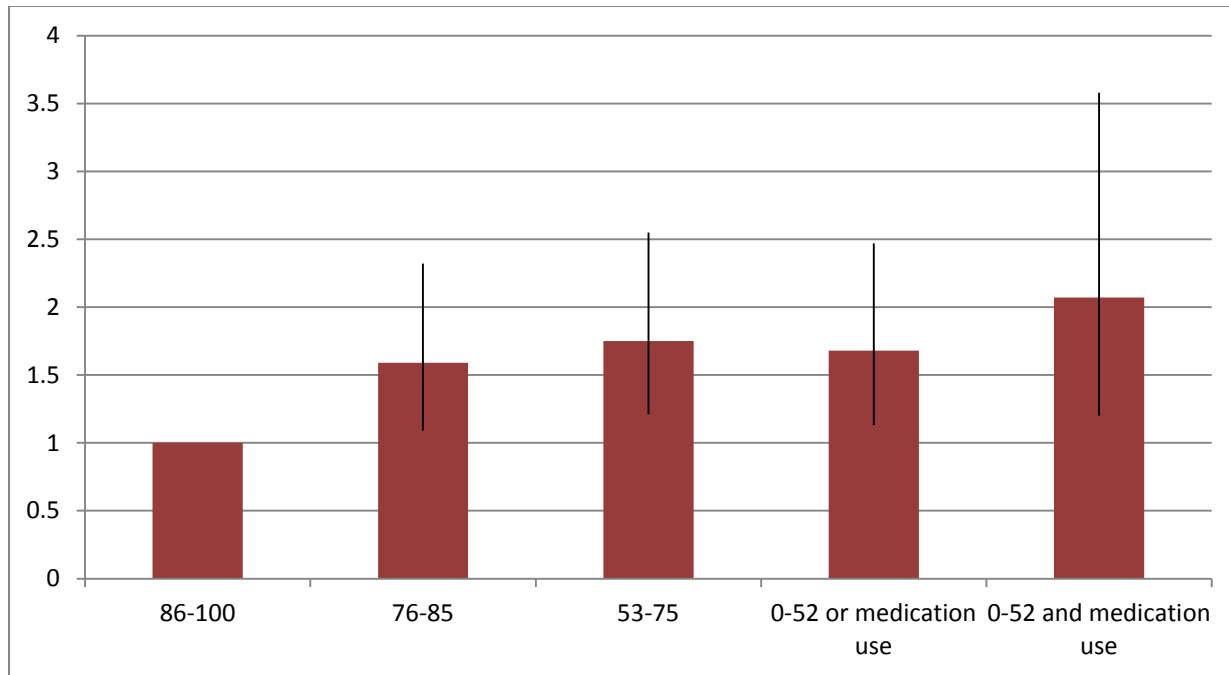

Supplemental Fig. 2 Multivariate relative risk of subsequent psoriasis by Mental Health Index score and anti-depression medication use among confirmed cases of psoriasis
